# Supplementary material
Source: publisher site journal article supplement (https://www.dovepress.com/article/250904)
Supplement: Supplementary file 1 [file get_supplementary_file.php]

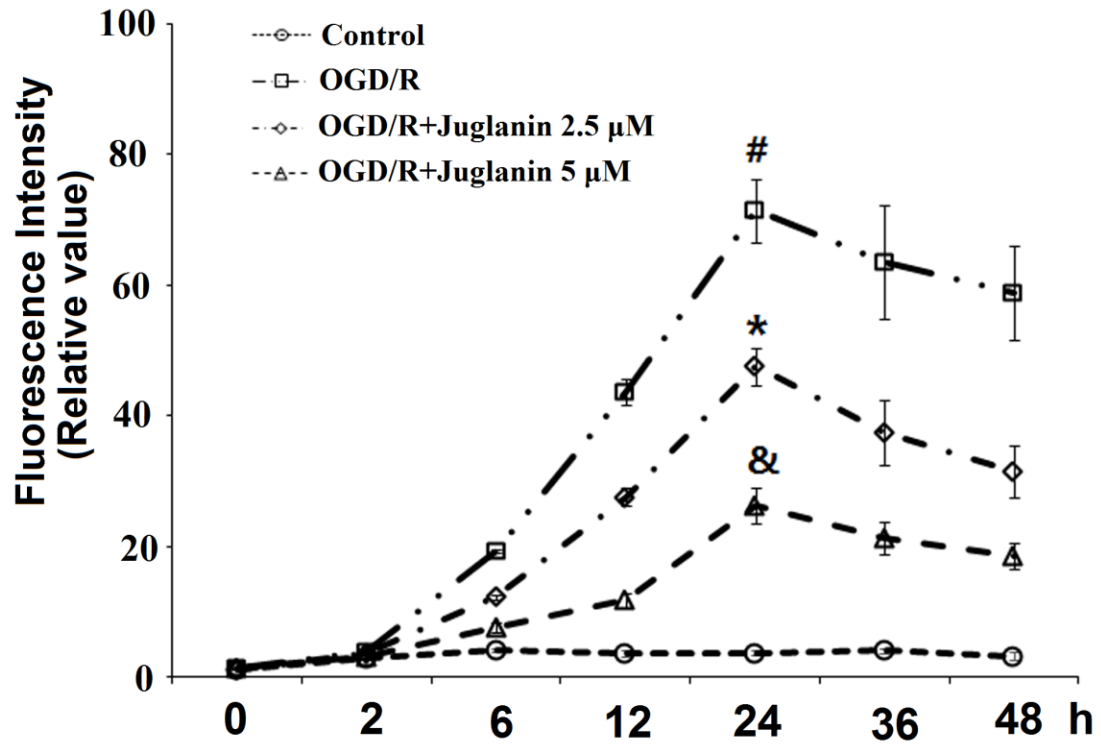

**Supplementary Figure 1.** The time-dependent manner of juglanin in reducing OGD/R- induced endothelial monolayer permeability in HBMVECs. HBMVECs were exposed to hypoxia conditions for 6 h, followed by exposure to reperfusion media for different time points (0, 0.5 2, 6, 12, 24, and 48 h) in the presence or absence of juglanin (2.5, 5  $\mu$ M). Endothelial permeability was assessed by FITC-dextran efflux (\*,  $P < 0.01$  vs. vehicle; #,  $P < 0.01$  vs. OGD/R; \$,  $P < 0.01$  vs. OGD/R + 2.5  $\mu$ M juglanin).
